# Supplementary figures and images for: The Transcription Factor Promyelocytic Leukemia Zinc Finger Protein Is Associated With Expression of Liver‐Homing Receptors on Human Blood CD56bright Natural Killer Cells
Source: PubMed Central journal article supplement — Hepatol Commun. 2020 Jan 6;4(3):409–24. doi: 10.1002/hep4.1463 (PMC7049682; doi:10.1002/hep4.1463), 2020-01-06

# Figure S1

## A Gating strategy

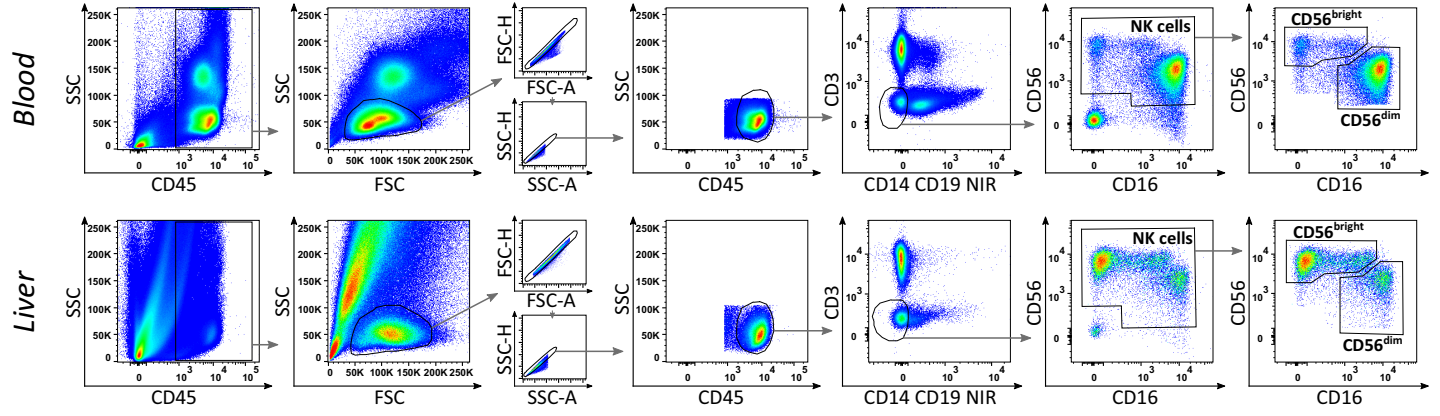

## B

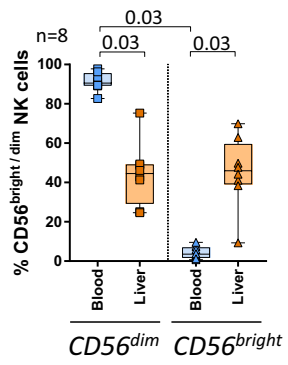

Supplement: HEP4-4-409-s001.pdf [file HEP4-4-409-s001.pdf]

# Figure S2

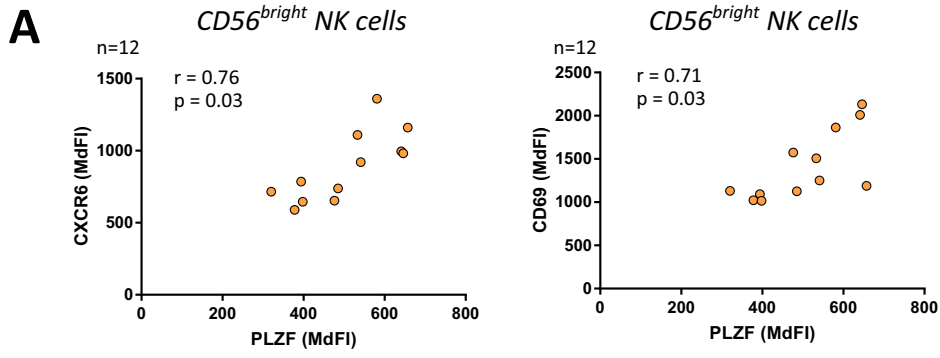

Supplement: HEP4-4-409-s002.pdf [file HEP4-4-409-s002.pdf]

**Figure S3**

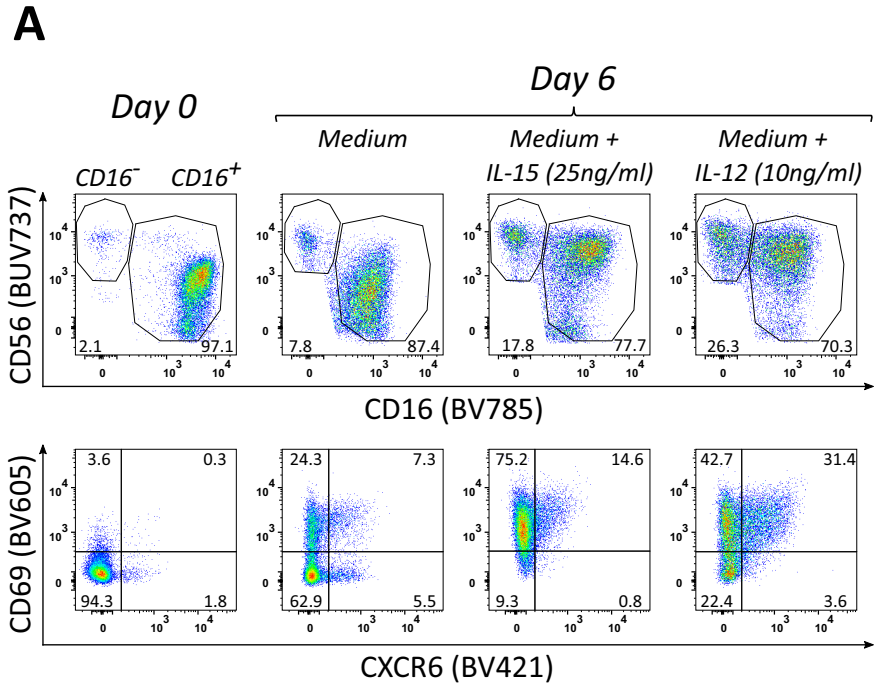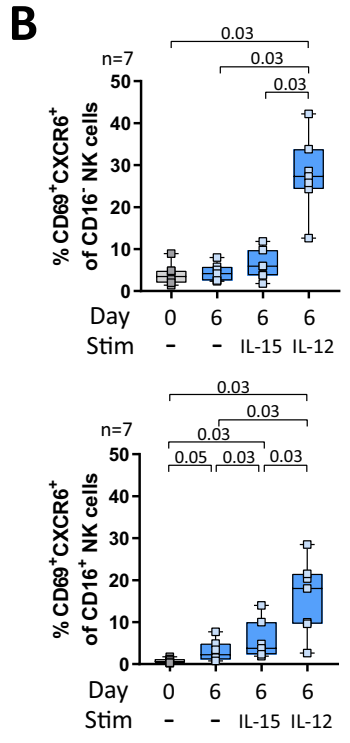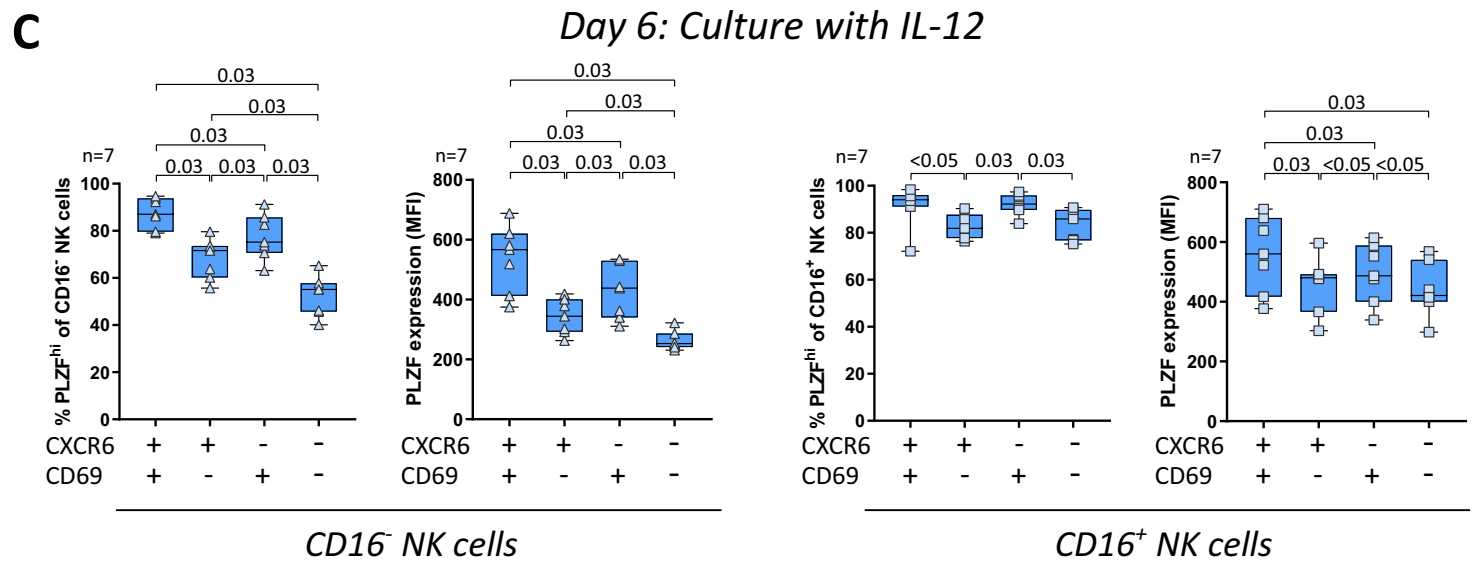

Supplement: HEP4-4-409-s003.pdf [file HEP4-4-409-s003.pdf]

**Figure S4**

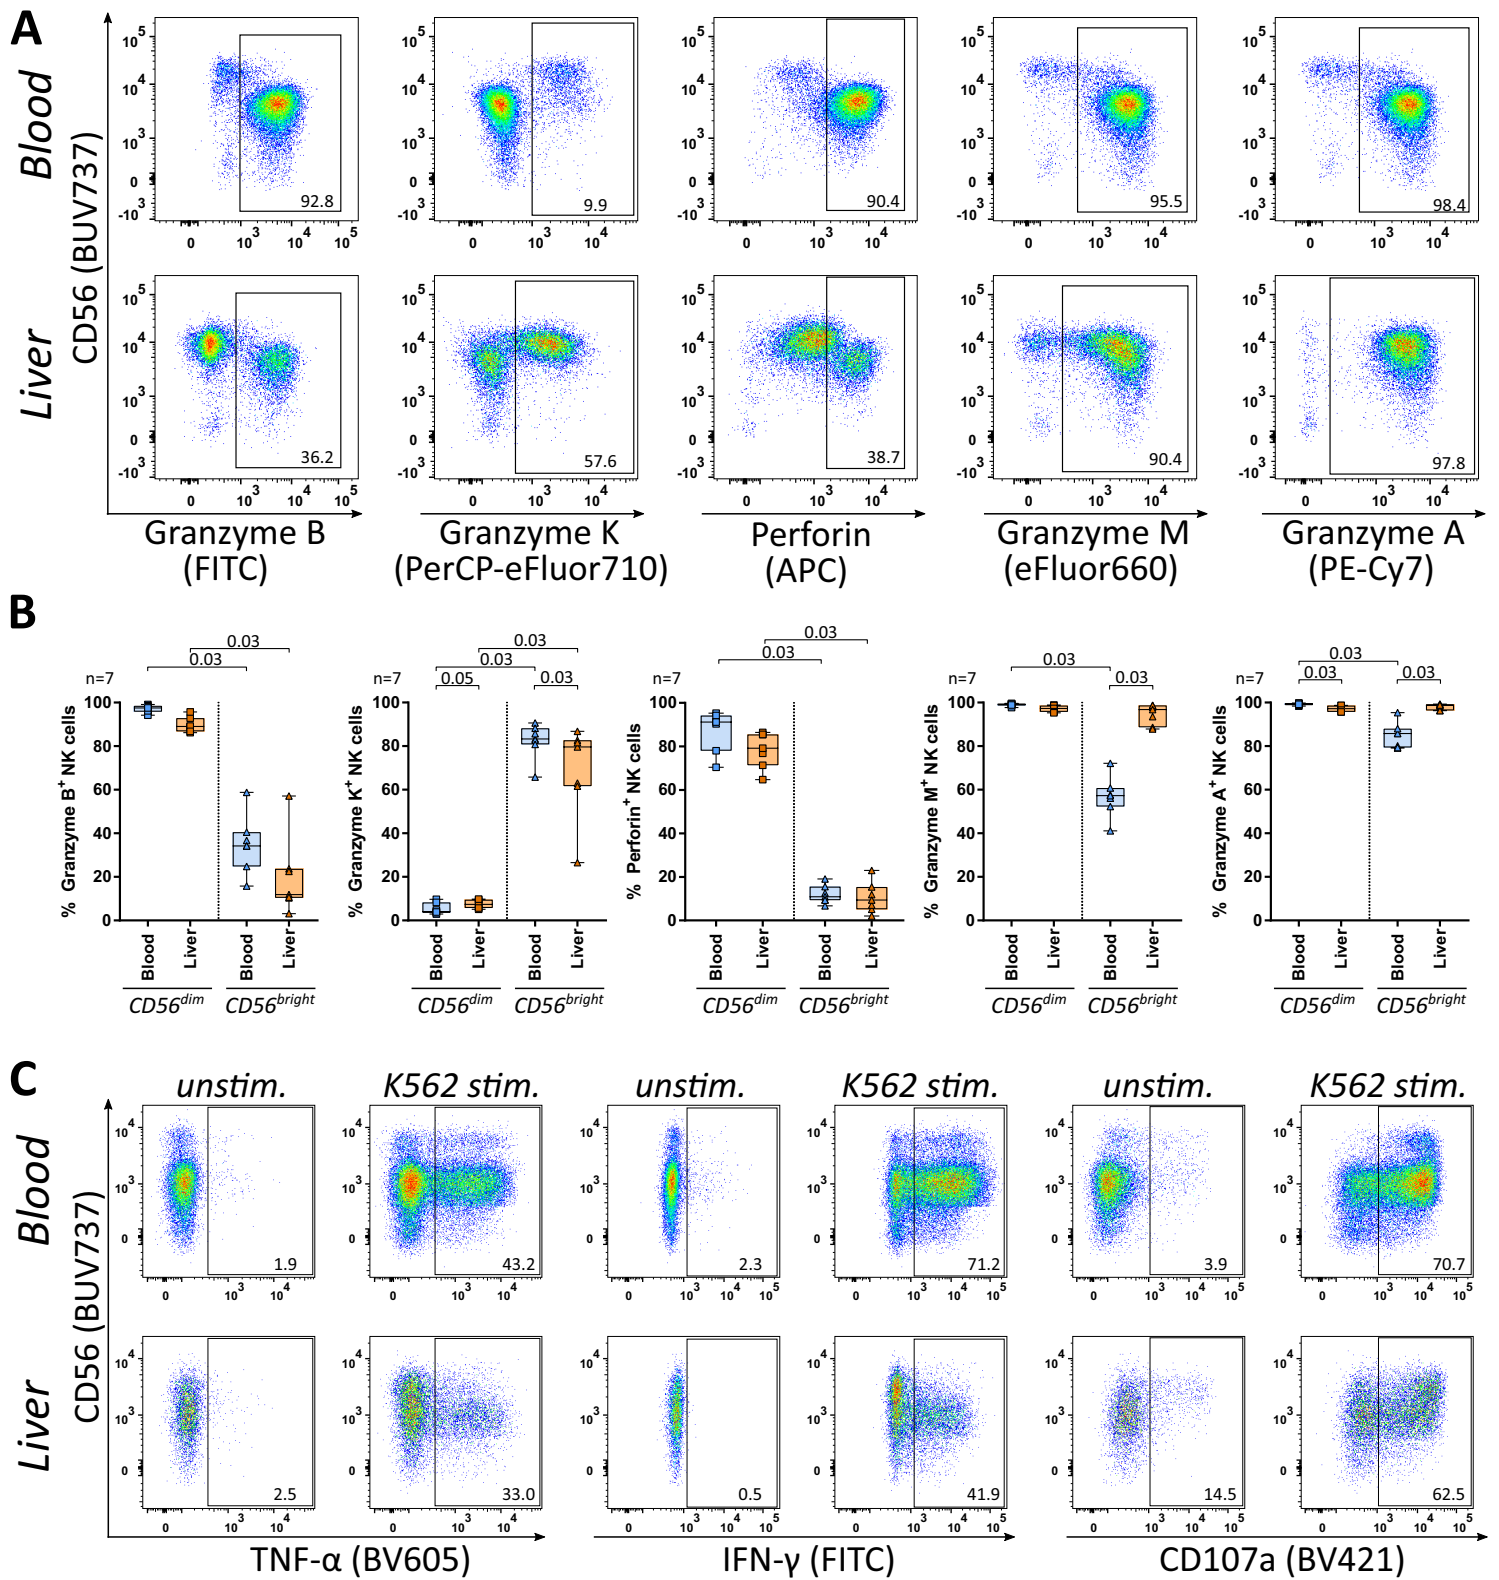

Supplement: HEP4-4-409-s004.pdf [file HEP4-4-409-s004.pdf]
